# Supplementary material
Source: publisher figshare collection journal article supplement (https://tandf.figshare.com/ndownloader/files/38179802)
Supplement: Supplementary file 1 [file 38179802]

**UEFS-P**

1. Thinking of the past 4 weeks, indicate whether you did or attempted to do the following tasks using your prosthesis.

| **Completion with prosthesis** | No | Yes |
| --- | --- | --- |
| **One-handed Tasks** |  |  |
| Wash your face |  |  |
| Brush or comb your hair | 1 | 2 |
| Put on underwear | 1 | 2 |
| Drink from a paper cup | 1 | 2 |
| Eat with a fork or spoon | 1 | 2 |
| Write your name legibly | 1 | 2 |
| Use a key in lock | 1 | 2 |
| Open a door with a round knob | 1 | 2 |
| Lift a shopping bag containing about 20 pounds | 1 | 2 |

1. Thinking of the past 4 weeks, please rate your experience performing the following tasks with the assistance of your prosthesis

| **Difficult Rating** | Did not do | Could not do | Very Difficult | Difficult | Easy | Very Easy |
| --- | --- | --- | --- | --- | --- | --- |
|  |  |  |  |  |  |  |
| **Two-handed Tasks** |  |  |  |  |  |  |
| Put toothpaste on a brush and brush your teeth | 1 | 2 | 3 | 4 | 5 | 6 |
| Fold a bath towel | 1 | 2 | 3 | 4 | 5 | 6 |
| Button a shirt with front buttons | 1 | 2 | 3 | 4 | 5 | 6 |
| Put on socks | 1 | 2 | 3 | 4 | 5 | 6 |
| Tie shoelaces | 1 | 2 | 3 | 4 | 5 | 6 |
| Attach the end of a zipper and zip a jacket | 1 | 2 | 3 | 4 | 5 | 6 |
| Cut meat with a knife and fork | 1 | 2 | 3 | 4 | 5 | 6 |
| Chop vegetables at a counter | 1 | 2 | 3 | 4 | 5 | 6 |
| Spread peanut butter on fresh bread | 1 | 2 | 3 | 4 | 5 | 6 |
| Pour from a 12 ounce can without spilling or crushing it | 1 | 2 | 3 | 4 | 5 | 6 |
| Hold a small bottle to twist off the lid | 1 | 2 | 3 | 4 | 5 | 6 |
| Hold potatoes or fruit to peel them | 1 | 2 | 3 | 4 | 5 | 6 |
| Open a bag of chips using both hands | 1 | 2 | 3 | 4 | 5 | 6 |
| Hold an envelope to open it | 1 | 2 | 3 | 4 | 5 | 6 |
| Type on a computer keyboard | 1 | 2 | 3 | 4 | 5 | 6 |
| Take a dollar bill out of a wallet | 1 | 2 | 3 | 4 | 5 | 6 |
| Hold a nail to hammer | 1 | 2 | 3 | 4 | 5 | 6 |
| Carry a laundry basket | 1 | 2 | 3 | 4 | 5 | 6 |
| Lift a shopping bag containing about 10 pounds, using your prosthesis only | 1 | 2 | 3 | 4 | 5 | 6 |
| Lift and carry bulky objects like grocery bags or crates that weigh more than 15 pounds | 1 | 2 | 3 | 4 | 5 | 6 |

***Scoring algorithm for One-handed Task Scale**

1. Sum all scores.
2. Use scoring crosswalk file (Appendix D) to transform raw summed scores to T-scores.

***Scoring algorithm for Two-handed Task Scale**

1. Rescore all items so that responses of 3 (very difficult), 4 (difficult) and 5 (easy) are recoded as **2**.
2. Rescore all items so that responses of 6 (very easy) are recoded as **3**, *except* for the item ‘hold a nail to hammer’ which should be recoded as **2**.
3. Sum all recoded scores.
4. Use scoring crosswalk file (Appendix D) to transform raw summed scores to T-scores.
